# Supplementary material
Source: publisher figshare collection journal article supplement (https://aacr.figshare.com/articles/dataset/_/22489017)
Supplement: Supplementary file 1 [file 39940638]

**Table S1.** Response in different histological subtypes.

| Histological subtypes                | Response n (%) |          |          |          |          | ORR (%) |
|--------------------------------------|----------------|----------|----------|----------|----------|---------|
|                                      | CR             | PR       | SD       | PD       | Unknown  |         |
| Undifferentiated pleomorphic sarcoma | 0              | 4 (44.4) | 3 (50.0) | 1 (16.7) | 1 (16.7) | 44.4    |
| Synovial sarcoma                     | 0              | 6 (50.0) | 6 (50.0) | 0        | 0        | 50.0    |
| Leiomyosarcoma                       | 0              | 1 (9.1)  | 6 (54.5) | 4 (36.4) | 0        | 9.1     |
| Liposarcoma                          | 1 (12.5)       | 0        | 5 (62.5) | 1 (12.5) | 1 (12.5) | 12.5    |
| Dedifferentiated Liposarcoma         | 0              | 0        | 5 (83.3) | 1 (16.7) | 0        | 0       |
| Myxoid liposarcoma                   | 1 (50.0)       | 0        | 0        | 0        | 1 (50.0) | 50.0    |
| Epithelioid sarcoma                  | 0              | 0        | 3 (60.0) | 2 (40.0) | 0        | 0       |
| Desmoplastic small round cell tumor  | 0              | 1 (20.0) | 3 (60.0) | 0        | 1 (20.0) | 20.0    |
| Sarcoma, NOS                         | 0              | 4 (44.4) | 5 (55.6) | 0        | 0        | 44.4    |
| Fibrosarcoma                         | 0              | 0        | 2 (50.0) | 2 (50.0) | 0        | 0       |
| Anigosarcoma                         | 0              | 1 (50.0) | 1 (50.0) | 0        | 0        | 50.0    |

Note: CR: Complete response; PR: Partial response; SD: Stable response; PD: Progressive disease; ORR: overall response rate.

**Table S2.** Multivariate analysis of patient progression-free survival and overall survival.

| Indicator    | Progression-free survival |                         |         | Overall survival |                         |         |
|--------------|---------------------------|-------------------------|---------|------------------|-------------------------|---------|
|              | Hazard ratio              | 95% Confidence interval | p value | Hazard ratio     | 95% Confidence interval | p value |
| <b>LMR</b>   |                           |                         |         |                  |                         |         |
| Low group    | 1                         | -                       | 0.291   | 1                | -                       | 0.449   |
| High group   | 0.66                      | 0.30-1.43               |         | 0.74             | 0.33-1.63               |         |
| <b>NLR</b>   |                           |                         |         |                  |                         |         |
| Low group    | 1                         | -                       | 0.474   | 1                | -                       | 0.047   |
| High group   | 1.29                      | 0.64-2.58               |         | 2.23             | 1.01-4.91               |         |
| <b>Stage</b> |                           |                         |         |                  |                         |         |
| Advanced     | 1                         | -                       | 0.034   | 1                | -                       | 0.299   |
| Metastatic   | 2.56                      | 1.07-6.08               |         | 1.75             | 0.61-4.99               |         |

Note: LMR: lymphocyte-to-monocyte ratio; NLR: Neutrophil-to-lymphocyte ratio.

**Table S3.** Baseline characteristics of the 23 patients with samples available for genomic analysis.

|                                       | Number of patients | %    |
|---------------------------------------|--------------------|------|
| Sex                                   |                    |      |
| Male                                  | 15                 | 65.2 |
| Female                                | 8                  | 34.8 |
| Performance status                    |                    |      |
| 0                                     | 3                  | 13.0 |
| 1                                     | 19                 | 82.6 |
| 2                                     | 1                  | 4.3  |
| Histology                             |                    |      |
| Synovial sarcoma                      | 7                  | 30.4 |
| Leiomyosarcoma                        | 5                  | 21.7 |
| Undifferentiated pleomorphic sarcoma  | 3                  | 13.0 |
| Liposarcoma                           | 2                  | 8.7  |
| Anigosarcoma                          | 1                  | 4.3  |
| Epithelioid sarcoma                   | 1                  | 4.3  |
| Fibrosarcoma                          | 1                  | 4.3  |
| Sarcoma, NOS                          | 2                  | 8.7  |
| Alveolar soft part sarcoma            | 1                  | 4.3  |
| Location of primary tumor             |                    |      |
| Trunk and Extremity                   | 13                 | 56.5 |
| Retroperitoneal                       | 3                  | 13.0 |
| Intra-abdominal and thoracic visceral | 6                  | 26.1 |
| Head and neck                         | 1                  | 4.3  |
| Metastasis                            |                    |      |
| Lung                                  | 17                 | 73.9 |

|             |   |      |
|-------------|---|------|
| Liver       | 4 | 17.4 |
| Bone        | 3 | 13.0 |
| Lymph nodes | 7 | 30.4 |

---

**Table S4. REMARK checklist.**

| Item to be reported                                                                                                                                                                                                                                                                                                        | Page no. |
|----------------------------------------------------------------------------------------------------------------------------------------------------------------------------------------------------------------------------------------------------------------------------------------------------------------------------|----------|
| <b>INTRODUCTION</b>                                                                                                                                                                                                                                                                                                        |          |
| 1 State the marker examined, the study objectives, and any pre-specified hypotheses.                                                                                                                                                                                                                                       | 5        |
| <b>MATERIALS AND METHODS</b>                                                                                                                                                                                                                                                                                               |          |
| <i>Patients</i>                                                                                                                                                                                                                                                                                                            |          |
| 2 Describe the characteristics (e.g., disease stage or co-morbidities) of the study patients, including their source and inclusion and exclusion criteria.                                                                                                                                                                 | 6        |
| 3 Describe treatments received and how chosen (e.g., randomized or rule-based).                                                                                                                                                                                                                                            | 6        |
| <i>Specimen characteristics</i>                                                                                                                                                                                                                                                                                            |          |
| 4 Describe type of biological material used (including control samples) and methods of preservation and storage.                                                                                                                                                                                                           | 7-8      |
| <i>Assay methods</i>                                                                                                                                                                                                                                                                                                       |          |
| 5 Specify the assay method used and provide (or reference) a detailed protocol, including specific reagents or kits used, quality control procedures, reproducibility assessments, quantitation methods, and scoring and reporting protocols. Specify whether and how assays were performed blinded to the study endpoint. | 8-9      |
| <i>Study design</i>                                                                                                                                                                                                                                                                                                        |          |
| 6 State the method of case selection, including whether prospective or retrospective and whether stratification or matching (e.g., by stage of disease or age) was used. Specify the time period from which cases were taken, the end of the follow-up period, and the median follow-up time.                              | 6-7      |
| 7 Precisely define all clinical endpoints examined.                                                                                                                                                                                                                                                                        |          |
| 8 List all candidate variables initially examined or considered for inclusion in models.                                                                                                                                                                                                                                   | 7-9      |
| 9 Give rationale for sample size; if the study was designed to detect a specified effect size, give the target power and effect size.                                                                                                                                                                                      |          |
| <i>Statistical analysis methods</i>                                                                                                                                                                                                                                                                                        |          |
| 10 Specify all statistical methods, including details of any variable selection procedures and other model-building issues, how model assumptions were verified, and how missing data were handled.                                                                                                                        | -        |
| 11 Clarify how marker values were handled in the analyses; if relevant, describe methods used for cutpoint determination.                                                                                                                                                                                                  | 9        |
| <b>RESULTS</b>                                                                                                                                                                                                                                                                                                             |          |
| <i>Data</i>                                                                                                                                                                                                                                                                                                                |          |
| 12 Describe the flow of patients through the study, including the number of patients included in each stage of the analysis (a diagram may be helpful) and reasons for dropout. Specifically, both overall and for each subgroup extensively examined report the numbers of patients and the number of events.             | 10       |
| 13 Report distributions of basic demographic characteristics (at least age and sex),                                                                                                                                                                                                                                       | 10       |

|                                  |                                                                                                                                                                                                                                                                                                                                         |       |
|----------------------------------|-----------------------------------------------------------------------------------------------------------------------------------------------------------------------------------------------------------------------------------------------------------------------------------------------------------------------------------------|-------|
|                                  | standard (disease-specific) prognostic variables, and tumor marker, including numbers of missing values.                                                                                                                                                                                                                                |       |
| <i>Analysis and presentation</i> |                                                                                                                                                                                                                                                                                                                                         |       |
| 14                               | Show the relation of the marker to standard prognostic variables.                                                                                                                                                                                                                                                                       |       |
| 15                               | Present univariable analyses showing the relation between the marker and outcome, with the estimated effect (e.g., hazard ratio and survival probability). Preferably provide similar analyses for all other variables being analyzed. For the effect of a tumor marker on a time-to-event outcome, a Kaplan-Meier plot is recommended. | 11-12 |
| 16                               | For key multivariable analyses, report estimated effects (e.g., hazard ratio) with confidence intervals for the marker and, at least for the final model, all other variables in the model.                                                                                                                                             | 11-12 |
| 17                               | Among reported results, provide estimated effects with confidence intervals from an analysis in which the marker and standard prognostic variables are included, regardless of their statistical significance.                                                                                                                          | 11-12 |
| 18                               | If done, report results of further investigations, such as checking assumptions, sensitivity analyses, and internal validation.                                                                                                                                                                                                         | -     |
| <b>DISCUSSION</b>                |                                                                                                                                                                                                                                                                                                                                         |       |
| 19                               | Interpret the results in the context of the pre-specified hypotheses and other relevant studies; include a discussion of limitations of the study.                                                                                                                                                                                      | 15-16 |
| 20                               | Discuss implications for future research and clinical value.                                                                                                                                                                                                                                                                            | 15-16 |

**Table S5** STROBE Statement—checklist of items that should be included in reports of observational studies

|                           | <b>Item No.</b> | <b>Recommendation</b>                                                                                                           | <b>Page No.</b> |
|---------------------------|-----------------|---------------------------------------------------------------------------------------------------------------------------------|-----------------|
| <b>Title and abstract</b> | 1               | (a) Indicate the study's design with a commonly used term in the title or the abstract                                          | 1               |
|                           |                 | (b) Provide in the abstract an informative and balanced summary of what was done and what was found                             | 4               |
| <b>Introduction</b>       |                 |                                                                                                                                 |                 |
| Background/rationale      | 2               | Explain the scientific background and rationale for the investigation being reported                                            | 4-5             |
| Objectives                | 3               | State specific objectives, including any prespecified hypotheses                                                                | 5               |
| <b>Methods</b>            |                 |                                                                                                                                 |                 |
| Study design              | 4               | Present key elements of study design early in the paper                                                                         | 6-8             |
| Setting                   | 5               | Describe the setting, locations, and relevant dates, including periods of recruitment, exposure, follow-up, and data collection | 6-8             |



|                        |     |                                                                                                                                                                                                              |      |
|------------------------|-----|--------------------------------------------------------------------------------------------------------------------------------------------------------------------------------------------------------------|------|
| Quantitative variables | 11  | Explain how quantitative variables were handled in the analyses. If applicable, describe which groupings were chosen and why                                                                                 | 9-10 |
| Statistical methods    | 12  | (a) Describe all statistical methods, including those used to control for confounding                                                                                                                        | 9-10 |
|                        |     | (b) Describe any methods used to examine subgroups and interactions                                                                                                                                          | 9-10 |
|                        |     | (c) Explain how missing data were addressed                                                                                                                                                                  |      |
|                        |     | (d) <i>Cohort study</i> —If applicable, explain how loss to follow-up was addressed                                                                                                                          | 9-10 |
|                        |     | <i>Case-control study</i> —If applicable, explain how matching of cases and controls was addressed                                                                                                           |      |
|                        |     | <i>Cross-sectional study</i> —If applicable, describe analytical methods taking account of sampling strategy                                                                                                 |      |
|                        |     | (e) Describe any sensitivity analyses                                                                                                                                                                        | NA   |
| <b>Results</b>         |     |                                                                                                                                                                                                              |      |
| Participants           | 13* | (a) Report numbers of individuals at each stage of study—eg numbers potentially eligible, examined for eligibility, confirmed eligible, included in the study, completing follow-up, and analysed            | 11   |
|                        |     | (b) Give reasons for non-participation at each stage                                                                                                                                                         |      |
|                        |     | (c) Consider use of a flow diagram                                                                                                                                                                           |      |
| Descriptive data       | 14* | (a) Give characteristics of study participants (eg demographic, clinical, social) and information on exposures and potential confounders                                                                     | 10   |
|                        |     | (b) Indicate number of participants with missing data for each variable of interest                                                                                                                          | 11   |
|                        |     | (c) <i>Cohort study</i> —Summarise follow-up time (eg, average and total amount)                                                                                                                             | 11   |
| Outcome data           | 15* | <i>Cohort study</i> —Report numbers of outcome events or summary measures over time                                                                                                                          | 11   |
|                        |     | <i>Case-control study</i> —Report numbers in each exposure category, or summary measures of exposure                                                                                                         | NA   |
|                        |     | <i>Cross-sectional study</i> —Report numbers of outcome events or summary measures                                                                                                                           | NA   |
| Main results           | 16  | (a) Give unadjusted estimates and, if applicable, confounder-adjusted estimates and their precision (eg, 95% confidence interval). Make clear which confounders were adjusted for and why they were included | 11   |
|                        |     | (b) Report category boundaries when continuous variables were categorized                                                                                                                                    | 11   |
|                        |     | (c) If relevant, consider translating estimates of relative risk into absolute risk for a meaningful time period                                                                                             | NA   |

Continued on next page

|                          |    |                                                                                                                                                                            |       |
|--------------------------|----|----------------------------------------------------------------------------------------------------------------------------------------------------------------------------|-------|
| Other analyses           | 17 | Report other analyses done—eg analyses of subgroups and interactions, and sensitivity analyses                                                                             | 12-13 |
| <b>Discussion</b>        |    |                                                                                                                                                                            |       |
| Key results              | 18 | Summarise key results with reference to study objectives                                                                                                                   | 13    |
| Limitations              | 19 | Discuss limitations of the study, taking into account sources of potential bias or imprecision. Discuss both direction and magnitude of any potential bias                 | 17    |
| Interpretation           | 20 | Give a cautious overall interpretation of results considering objectives, limitations, multiplicity of analyses, results from similar studies, and other relevant evidence | 13-17 |
| Generalisability         | 21 | Discuss the generalisability (external validity) of the study results                                                                                                      | 13-17 |
| <b>Other information</b> |    |                                                                                                                                                                            |       |
| Funding                  | 22 | Give the source of funding and the role of the funders for the present study and, if applicable, for the original study on which the present article is based              | 10    |
